# Supplementary material
Source: publisher figshare collection journal article supplement (https://geolsoc.figshare.com/ndownloader/files/35238304)
Supplement: Supplementary file 1 [file 35238304]

## Sheet: Sheet1
Table S2. Hf isotope data
Analysis	Age (Ma)	± 2SE	Disc. (%)	176Hf/ 177Hfm	± 2SE	176Lu/ 177Hf	± 2SE*	176Hf/ 177Hft	± 2SE	eHf(t)	± 2SE†	TDM (Ma)	TNC (Ma)
9350-003.1	2465.14	39.64	0.2	0.281056	1.44567e-05	0.000551779	1.20756e-05	0.28103	1.51867e-05	-6.12827	0.540393	3354.24	3278.54		1
9350-013.1	2637.4	103.1	4.5	0.2811	1.97768e-05	0.000532814	5.13083e-06	0.281073	1.98759e-05	-0.565419	0.707144	3141.94	3054.69		1
9350-018.1	2459.98	131.46	-2.2	0.281308	2.63926e-05	0.00051624	1.45946e-05	0.281284	2.69847e-05	2.77356	0.959339	2798.46	2692.28		1
9350-026.1	2340.71	35.46	2.7	0.281021	1.64284e-05	0.000558383	6.74473e-06	0.280996	1.66316e-05	-10.2552	0.591882	3512.64	3445.56		1
9350-027.1	1831.9	142.32	-1	0.281324	1.73509e-05	0.000400145	1.03043e-05	0.28131	1.77888e-05	-10.8534	0.632356	3157.9	3071.76		1
9350-028.1	1901.32	32.96	3.7	0.281513	1.83206e-05	0.00111986	2.86026e-05	0.281473	2.13192e-05	-3.47694	0.757416	2757.51	2649.3		1
9350-029.1	1878.24	49.9	-1	0.281787	1.73852e-05	0.00175531	3.84176e-05	0.281724	2.27266e-05	4.9133	0.806697	2218.81	2080.74		1
9350-033.1	2676	119.28	-3.6	0.281181	1.55238e-05	0.0001757	7.03848e-06	0.281172	1.57606e-05	3.863	0.560532	2895.77	2795.03		1
9350-034.1	2584.7	29.52	-0.7	0.281209	1.89921e-05	0.000970792	6.9466e-05	0.281161	3.28624e-05	1.32451	1.16881	2984.14	2888.22		1
9350-038.1	2622.76	38.74	0.9	0.28118	1.63367e-05	0.000798328	9.68813e-06	0.28114	1.676e-05	1.46717	0.596144	3004.38	2909.59		1
9350-042.1	2210.25	44.58	1.8	0.281046	1.67348e-05	0.000525569	6.97228e-06	0.281024	1.69469e-05	-12.2892	0.603042	3537.06	3471.33		1
9350-048.1	2423.62	30	12.2	0.281213	1.46763e-05	0.0010955	2.1384e-05	0.281162	1.68268e-05	-2.41146	0.598474	3092.7	3002.69		1
9350-049.1	1810.79	77.44	4	0.281614	2.52344e-05	0.00135106	2.26562e-05	0.281567	2.66665e-05	-2.21373	0.947074	2609.74	2493.46		1
9350-053.1	3786.51	14.8	1.6	0.280316	1.52859e-05	0.000764015	2.08313e-06	0.28026	1.5308e-05	-2.26212	0.546205	4123.01	4090.95		1
9350-076.1	1732	38	-6.8	0.281368	1.72231e-05	0.00063382	6.14753e-06	0.281347	1.73807e-05	-11.8311	0.617768	3140.73	3053.77		1
9350-077.1	2594.25	21.78	2.8	0.281139	1.71147e-05	0.000625882	1.21799e-05	0.281108	1.77492e-05	-0.337665	0.6314	3094.78	3004.93		1
9350-079.1	2651.93	88.6	0.6	0.281062	2.11951e-05	0.000619218	5.66338e-06	0.28103	2.13078e-05	-1.74891	0.758203	3226.49	3143.88		1
9350-084.1	2537.56	43.24	2.9	0.281167	1.76268e-05	0.00061873	1.30021e-05	0.281137	1.83264e-05	-0.649159	0.651868	3070.72	2979.53		1
9350-085.1	2610.29	77.12	4.4	0.281174	2.05592e-05	0.000775278	6.78235e-06	0.281135	2.07254e-05	0.998466	0.737205	3024.01	2930.28		1
9350-087.1	2452.32	105.7	4.8	0.28119	1.81716e-05	0.000520735	4.63626e-06	0.281165	1.82591e-05	-1.62699	0.64941	3066.09	2974.62		1
9350-088.1	2082.12	41.42	1.5	0.281418	1.57801e-05	0.000876844	2.30015e-05	0.281383	1.80666e-05	-2.48914	0.642063	2835.44	2731.38		1
9350-091.1	2480.91	27.32	-0.1	0.281214	1.55493e-05	0.000776497	1.20984e-05	0.281177	1.62331e-05	-0.547616	0.577328	3021.04	2927.1		1
9350-093.1	2701.65	23.48	2.3	0.281032	1.99989e-05	0.00109506	3.02729e-05	0.280975	2.31764e-05	-2.53829	0.824857	3313.46	3235.63		1
9350-099.1	2709.61	50.76	4.3	0.281061	2.03959e-05	0.00089949	1.17677e-05	0.281014	2.0898e-05	-0.966114	0.743665	3222.05	3139.23		1
9350-109.1	1839.67	42.9	0.8	0.281787	1.58668e-05	0.000313613	8.8543e-06	0.281776	1.6221e-05	5.86598	0.575669	2129.69	1986.69		1
9350-114.1	1981.45	43.58	4	0.281381	1.85675e-05	0.000835921	4.20669e-05	0.281349	2.45487e-05	-6.01649	0.872533	2975.87	2879.6		1
9351-001.1	2081.13	25.88	3	0.281632	2.91633e-05	0.00283194	0.000262376	0.28152	0.000104499	2.33672	3.71196	2535.2	2414.55		1
9351-002.1	2338.83	30.72	3	0.28107	1.69262e-05	0.000393135	5.14048e-06	0.281053	1.70411e-05	-8.27321	0.606331	3389.44	3315.65		1
9351-003.1	3195.66	17.82	1.4	0.280848	1.63396e-05	0.00115297	1.42543e-05	0.280777	1.72617e-05	2.04889	0.614783	3405.46	3333.22		1
9351-004.1	2496.64	22.28	1.4	0.281275	1.53497e-05	0.000647892	2.17974e-06	0.281244	1.53727e-05	2.22884	0.546596	2860.46	2757.7		1
9351-005.1	1981.03	36.36	2.5	0.281593	1.52182e-05	0.000528725	4.63017e-06	0.281573	1.53205e-05	1.91633	0.544105	2484.47	2361.08		1
9351-006.1	2343.06	18.1	2	0.281125	1.55077e-05	0.000436891	6.65325e-06	0.281106	1.57171e-05	-6.28418	0.559117	3270.21	3189.91		1
9351-008.1	2366.2	415.36	15.7	0.281279	1.62265e-05	0.00107617	1.43268e-05	0.28123	1.7136e-05	-1.32203	0.609323	2981.18	2885.04		1
9351-009.1	2294.18	19.62	4.5	0.281148	1.64627e-05	0.000359978	4.11717e-05	0.281132	2.28243e-05	-6.49525	0.811871	3245.7	3164.07		1
9351-010.1	2389.95	22.14	2.5	0.281146	1.3735e-05	0.0005226	4.54786e-06	0.281123	1.3846e-05	-4.59723	0.492526	3202.08	3118.06		1
9351-012.1	2321.98	17.42	0.5	0.281147	1.63735e-05	0.000861103	7.23306e-06	0.281109	1.66076e-05	-6.65034	0.590789	3276.6	3196.65		1
9351-013.1	2504.99	30.6	3.6	0.281288	1.67366e-05	0.000615618	7.08869e-06	0.281259	1.69582e-05	2.94096	0.60294	2822.48	2717.63		1
9351-014.1	2582.52	19.96	2.8	0.281223	1.95305e-05	0.000238886	8.87881e-07	0.281211	1.95336e-05	3.05248	0.694622	2874.85	2772.91		1
9351-016.1	2508.98	23.08	2.4	0.281164	2.87059e-05	0.000528781	8.17564e-06	0.281139	2.88784e-05	-1.2336	1.02719	3085.1	2994.69		1
9351-018.1	2325.18	22.14	1.7	0.281044	2.34565e-05	0.000482631	6.31866e-06	0.281022	2.35818e-05	-9.66417	0.839144	3464.44	3394.74		1
9351-021.1	2343.71	11.32	2.8	0.280929	2.97096e-05	0.000783909	1.15484e-05	0.280894	3.00393e-05	-13.8073	1.06942	3732.49	3677.33		1
9351-025.1	2354.67	32.88	2.8	0.281057	2.39247e-05	0.000760188	2.5513e-05	0.281023	2.58569e-05	-8.95952	0.9201	3443.8	3372.96		1
9351-029.1	2369.53	18.76	2	0.281053	6.52219e-05	0.000747918	4.11958e-05	0.281019	6.7118e-05	-8.74717	2.38838	3442.15	3371.23		1
9351-036.1	1928.25	108.26	3.5	0.281336	7.94358e-05	0.00041573	5.56436e-06	0.281321	7.94641e-05	-8.25926	2.82468	3072.94	2982.05		1
9351-037.1	2319.31	44.5	0.5	0.281047	2.96032e-05	0.000789042	1.64097e-05	0.281012	3.0267e-05	-10.1776	1.07707	3491.45	3423.22		1
9351-044.1	2911.47	32.06	1.6	0.280936	3.05433e-05	0.00108845	8.75546e-06	0.280875	3.07321e-05	-1.16405	1.09415	3388.61	3315.06		1
9351-045.1	2177.05	21.9	1.1	0.281388	2.65821e-05	0.00257741	0.000194583	0.281281	7.91499e-05	-3.91048	2.81391	2996.26	2901		1
9351-046.1	2370.01	33.18	3.7	0.281059	3.48278e-05	0.00119439	2.62673e-05	0.281005	3.62629e-05	-9.25337	1.29047	3473.63	3404.42		1
9351-052.1	2476.33	15.46	1.3	0.281294	4.4038e-05	0.000750581	1.98453e-05	0.281258	4.46969e-05	2.23707	1.58918	2844.39	2740.75		1
9351-053.1	2477.98	26.46	3.2	0.281301	2.37574e-05	0.000870783	4.97558e-05	0.28126	3.05276e-05	2.34179	1.08539	2839.14	2735.2		1
9351-055.1	2223.58	81.34	9.4	0.281303	2.25937e-05	4.29076e-05	1.82428e-06	0.281301	2.26045e-05	-2.12662	0.803571	2921.63	2822.25		1
9351-063.1	2341.74	31.72	3.6	0.281	3.10517e-05	0.000478256	1.49715e-05	0.280978	3.15803e-05	-10.8419	1.12394	3549.43	3484.34		1
9351-064.1	2649.36	326.28	5.2	0.28087	1.97956e-05	0.000263227	5.22557e-07	0.280857	1.97966e-05	-7.97936	0.704865	3609.48	3547.73		1
9351-067.1	1925.04	41.5	3.5	0.281393	2.04224e-05	0.000305064	4.75156e-06	0.281382	2.05026e-05	-6.17536	0.72864	2942.25	2844.19		1
9351-068.1	2475.51	27.88	1.6	0.281286	2.43134e-05	0.000884139	2.86555e-06	0.281245	2.43384e-05	1.74203	0.865384	2874.59	2772.6		1
9351-071.1	2860.33	28.56	0	0.28086	2.04158e-05	0.000334856	2.71684e-06	0.280842	2.0443e-05	-3.55869	0.727919	3497.99	3430.34		1
9351-072.1	2517.88	30.7	-0.2	0.281279	2.61043e-05	0.000793822	1.79044e-05	0.28124	2.70017e-05	2.58479	0.960094	2854.54	2751.46		1
9351-074.1	2367.57	47.22	6.3	0.281064	5.9966e-05	0.000920708	1.64787e-05	0.281022	6.02998e-05	-8.67527	2.14573	3436.22	3364.98		1
9351-075.1	2490.95	22.82	8.4	0.281258	5.17433e-05	0.00119031	2.90223e-05	0.281202	5.29384e-05	0.578794	1.88258	2958.76	2861.41		1
9351-076.1	2331.37	41.36	2.3	0.280842	2.00853e-05	0.000578818	2.1061e-05	0.280816	2.16543e-05	-16.8565	0.771122	3909.04	3863.42		1
9351-077.1	2563.93	29.88	1.3	0.28124	2.52168e-05	0.000450881	1.02343e-05	0.281218	2.55242e-05	2.84851	0.907632	2873.35	2771.32		1
9351-084.1	1919.54	170.68	-5.5	0.281468	2.59325e-05	0.000831362	5.14017e-06	0.281437	2.60065e-05	-4.32507	0.92406	2823.91	2719.35		1
9352-001.1	3109.52	21.18	2.7	0.280701	2.28128e-05	0.000553651	1.53345e-06	0.280668	2.28206e-05	-3.85986	0.813081	3706.92	3650.92		1
9352-002.1	2515.07	40.76	0.8	0.28127	2.61278e-05	0.00133117	2.51032e-05	0.281206	2.7863e-05	1.29183	0.990839	2932.89	2834.12		1
9352-003.1	3128.5	9.82	1.3	0.280837	1.95918e-05	0.000891581	8.9562e-06	0.280784	1.99007e-05	0.696818	0.708758	3438.51	3367.97		1
9352-003.1	2000	9.82	1.3	0.28141	1.92813e-05	0.000628095	8.70288e-06	0.281386	1.95657e-05	-4.29381	0.695333	2883.87	2782.54		1
9352-006.1	2630.46	34.28	3.3	0.281222	1.84736e-05	0.000745426	6.97965e-06	0.281185	1.86694e-05	3.24227	0.663955	2899.68	2799.13		1
9352-007.1	2614.72	23.1	1.3	0.281201	2.37166e-05	0.000771874	3.01613e-06	0.281162	2.37452e-05	2.07063	0.844539	2960.66	2863.46		1
9352-008.1	2707.97	19.78	1.8	0.28109	2.26164e-05	0.000942179	1.45095e-05	0.281041	2.33029e-05	-0.0542542	0.829164	3164.17	3078.18		1
9352-009.1	2494.64	55.04	-0.1	0.281228	2.17505e-05	0.00059486	4.80036e-06	0.281199	2.1829e-05	0.581265	0.776284	2961.43	2864.23		1
9352-010.1	1703.64	102.56	1	0.281415	3.49323e-05	0.000709618	2.02877e-05	0.281392	3.57718e-05	-10.9117	1.27125	3062.58	2971.38		1
9352-011.1	2491.28	19.76	-0.2	0.281199	1.95434e-05	0.000700877	4.23377e-06	0.281166	1.96114e-05	-0.696195	0.697502	3038.2	2945.21		1
9352-013.1	2356.55	31.46	1.3	0.281106	2.10461e-05	0.000781003	6.64527e-06	0.281071	2.12006e-05	-7.2218	0.75428	3338.33	3261.75		1
9352-014.1	3309.37	114.46	2.7	0.280684	2.27128e-05	0.00109596	2.59591e-05	0.280614	2.48811e-05	-1.04183	0.886664	3684.45	3627.58		1
9352-015.1	2516.32	25.16	2	0.281316	2.44546e-05	0.00155866	1.12918e-05	0.281241	2.48391e-05	2.55985	0.883199	2854.9	2751.84		1
9352-016.1	2264.18	86.06	2	0.28139	2.09896e-05	0.000913388	1.59062e-05	0.281351	2.18592e-05	0.580921	0.776938	2784.84	2677.91		1
9352-019.1	2513.88	22.22	0.8	0.281186	2.13953e-05	0.000588952	8.34529e-06	0.281158	2.16359e-05	-0.444436	0.769529	3039.88	2946.99		1
9352-022.1	2390.92	34.86	2.2	0.280993	2.01824e-05	0.000564632	4.7493e-06	0.280968	2.02649e-05	-10.082	0.721255	3540.57	3475		1
9352-023.1	2509.6	15.2	1.9	0.281182	2.31232e-05	0.000700225	1.55082e-06	0.281149	2.31309e-05	-0.866162	0.82273	3062.78	2971.14		1
9352-026.1	3118.22	301.7	-2.1	0.280679	2.14598e-05	0.000356461	2.28138e-06	0.280658	2.14783e-05	-4.02269	0.765282	3723.64	3668.56		1
9352-029.1	2325.73	55.26	1.3	0.281196	2.01599e-05	0.000717941	2.18136e-06	0.281164	2.01773e-05	-4.61492	0.717636	3153.91	3067.26		1
9352-030.1	2314.48	17.12	1.6	0.281036	2.80248e-05	0.000508287	3.10623e-06	0.281014	2.80502e-05	-10.2137	0.998179	3489.96	3421.64		1
9352-031.1	2385.21	14.08	4.1	0.281269	2.50511e-05	0.00116347	3.41153e-05	0.281216	2.82797e-05	-1.39789	1.00562	3000.45	2905.38		1
9352-032.1	1720	46	1.4	0.281387	2.52954e-05	0.000665832	1.88301e-05	0.281365	2.62874e-05	-11.469	0.934279	3109.32	3020.66		1
9352-033.1	2471.27	24.3	1.5	0.281193	4.65421e-05	0.000734941	2.9088e-05	0.281158	4.78722e-05	-1.4402	1.70268	3069.03	2977.73		1
9352-035.1	2573.07	20.48	1.9	0.281136	2.23516e-05	0.000445027	4.229e-06	0.281114	2.24112e-05	-0.617515	0.797227	3095.94	3006.15		1
9352-039.1	2046.99	18.14	-0.6	0.281514	1.97597e-05	0.000523666	7.30756e-07	0.281494	1.97616e-05	0.639691	0.702027	2614.48	2498.25		1
9352-040.1	2966	18.54	1.5	0.28094	3.3003e-05	0.00108651	9.00102e-06	0.280879	3.31881e-05	0.23856	1.18158	3343.08	3267.11		1
9352-041.1	2324.22	27.36	1.3	0.281124	2.46428e-05	0.000771058	2.26912e-05	0.281089	2.61394e-05	-7.30194	0.929932	3318.45	3240.79		1
9352-046.1	2497.02	18.88	1.2	0.281227	1.90557e-05	0.000796221	7.19136e-06	0.281189	1.92563e-05	0.256638	0.684816	2983.43	2887.43		1
9352-047.1	2494.02	33.22	1.3	0.281206	2.13414e-05	0.000808307	5.57365e-06	0.281167	2.14492e-05	-0.572716	0.762864	3032.64	2939.34		1
9352-050.1	2595.91	17.82	1.9	0.281176	2.13371e-05	0.000857997	4.08943e-06	0.281133	2.13955e-05	0.599442	0.761043	3037.82	2944.84		1
9352-052.1	2391.22	17.58	2.3	0.281062	2.75251e-05	0.000853646	2.02179e-05	0.281023	2.86028e-05	-8.11029	1.01781	3419.63	3347.48		1
9352-053.1	2711.68	54.64	0.7	0.281201	2.83831e-05	0.000629267	1.84397e-05	0.281168	2.92664e-05	4.56567	1.04089	2879.16	2777.53		1
9352-058.1	1912.4	150.22	6.5	0.281315	2.16942e-05	0.00010677	2.18272e-06	0.281311	2.17102e-05	-8.98107	0.771751	3105.08	3015.97		1
9352-059.1	1878.7	37.26	0.6	0.281279	2.2329e-05	0.000448913	1.80874e-05	0.281263	2.33683e-05	-11.4503	0.830835	3230.52	3148.3		1
9352-063.1	2450.17	44.36	0.8	0.281269	2.67152e-05	0.00103797	3.02939e-05	0.28122	2.91514e-05	0.274622	1.0366	2946.43	2848.39		1
9352-064.1	2608.63	25.78	2.3	0.281166	2.15407e-05	0.000832504	1.15013e-05	0.281124	2.1994e-05	0.580202	0.782358	3048.75	2956.38		1
9352-066.1	2478.96	26.72	-0.2	0.281204	2.08568e-05	0.000835072	4.88458e-06	0.281165	2.09415e-05	-1.02665	0.744813	3049.27	2956.89		1
9353-004.1	2015.1	180.14	4.3	0.281541	1.97946e-05	0.00124896	1.619e-05	0.281493	2.07382e-05	-0.133264	0.736722	2637.96	2523.05		1
9353-005.1	2471.88	38.68	4.6	0.28119	1.67782e-05	0.000582925	1.77111e-05	0.281163	1.81126e-05	-1.24848	0.644203	3057.61	2965.68		1
9353-007.1	2321.43	15.46	-0.8	0.281073	1.62175e-05	0.000520349	1.72982e-06	0.28105	1.62311e-05	-8.77251	0.577516	3406.78	3333.94		1
9353-009.1	2378.89	43.04	1.8	0.28102	1.74206e-05	0.00114317	2.69048e-05	0.280968	2.02619e-05	-10.3438	0.721144	3547.4	3482.2		1
9353-01.1	2338.02	52.04	3.7	0.280921	1.92363e-05	0.000329608	3.39341e-06	0.280907	1.92805e-05	-13.4833	0.686365	3708.31	3651.84		1
9353-010.1	1831.31	30.08	1.7	0.281336	1.7338e-05	0.000435536	1.0165e-05	0.281321	1.77646e-05	-10.4869	0.63147	3134.99	3047.6		1
9353-011.1	2348.81	35.06	3.6	0.280988	2.04082e-05	0.000877951	2.05579e-05	0.280949	2.18846e-05	-11.739	0.778954	3609.85	3548.04		1
9353-015.1	1828.93	41.68	3.2	0.281289	1.52536e-05	0.000447143	3.94051e-06	0.281273	1.53272e-05	-12.2372	0.544922	3240.32	3158.69		1
9353-016.1	2518.33	37.96	1.5	0.281263	1.956e-05	0.000703804	2.09139e-05	0.281229	2.11571e-05	2.19351	0.752309	2879.26	2777.54		1
9353-017.1	2652.53	27.62	1.8	0.280846	2.13273e-05	0.000658087	7.20075e-06	0.280813	2.15082e-05	-9.47139	0.765926	3703.69	3647.04		1
9353-020.1	1984.28	39.78	1.8	0.281523	1.96168e-05	0.000255883	4.46992e-06	0.281513	1.96909e-05	-0.142493	0.699468	2614.85	2498.68		1
9353-022.1	1966.88	94.16	0.4	0.281438	1.85234e-05	0.000327693	3.61988e-06	0.281426	1.85748e-05	-3.6225	0.660025	2816.94	2711.94		1
9353-028.1	1906.14	40.36	2.4	0.281409	1.99569e-05	0.000346093	3.09387e-06	0.281396	1.99918e-05	-6.09596	0.710449	2922.81	2823.7		1
9353-034.1	1895.85	35.36	2.7	0.281303	2.0486e-05	0.000440959	3.35856e-06	0.281287	2.05259e-05	-10.1923	0.729714	3166.65	3080.93		1
9353-037.1	1884.84	52.62	1.4	0.28129	1.92771e-05	0.000583178	7.84455e-06	0.281269	1.95075e-05	-11.1008	0.693553	3213.85	3130.72		1
9353-039.1	1978.81	50.78	0.2	0.281483	1.79461e-05	0.000691092	1.32927e-05	0.281457	1.86497e-05	-2.25338	0.662613	2741.45	2632.28		1
9353-042.1	2371.37	34.32	1.9	0.280856	2.06146e-05	0.000289949	1.60719e-06	0.280843	2.06238e-05	-14.9802	0.734355	3825.37	3775.24		1
9353-049.1	2427.33	40.4	1.1	0.281168	2.05673e-05	0.000238253	9.51516e-07	0.281157	2.05706e-05	-2.48579	0.73164	3100.15	3010.55		1
9353-051.1	2688.3	14.3	3.8	0.280785	2.07945e-05	0.000456573	4.82104e-06	0.280762	2.0878e-05	-10.4544	0.743618	3791.47	3739.6		1
9353-055.1	2494.32	19.52	2.2	0.281255	3.12546e-05	0.000473748	1.29688e-05	0.281233	3.16517e-05	1.753	1.12546	2888.31	2787.08		1
9353-056.1	2742.11	22.7	4	0.281096	1.91308e-05	0.00016555	8.04877e-07	0.281087	1.91333e-05	2.38455	0.68069	3038.5	2945.65		1
9353-058.1	1920.58	47.68	0.7	0.281273	1.95851e-05	0.000281799	1.88007e-06	0.281263	1.95982e-05	-10.4968	0.696793	3204.37	3120.68		1
9353-062.1	2728.47	28.76	0.6	0.281309	2.66406e-05	0.00188217	4.65285e-05	0.28121	3.2158e-05	6.45383	1.14356	2773.89	2666.47		1
9353-065.1	2365.92	59.5	1.7	0.281123	2.0345e-05	0.00031313	5.8928e-07	0.281109	2.03462e-05	-5.62817	0.723783	3247.29	3165.74		1
9353-066.1	2342.28	46.4	2.4	0.280948	1.89423e-05	0.000588779	1.68938e-05	0.280922	2.00241e-05	-12.8466	0.712801	3672.64	3614.24		1
9353-067.1	2394.85	30.98	1.9	0.281061	2.25991e-05	0.000134144	5.40202e-07	0.281055	2.26e-05	-6.87176	0.804113	3346.16	3270.01		1
9353-068.1	2337.56	24.52	1.3	0.280992	2.3641e-05	0.000936169	6.43001e-05	0.28095	3.41976e-05	-11.9569	1.21721	3614.55	3553		1
9353-070.1	1988.23	28.24	2	0.281533	2.7541e-05	0.000819921	8.8924e-06	0.281502	2.77495e-05	-0.431311	0.985766	2635.8	2520.79		1
9353-071.1	1892.03	42.52	8.9	0.281319	2.04198e-05	0.000490664	1.75696e-05	0.281301	2.14896e-05	-9.79066	0.763937	3139.08	3051.85		1
9353-072.1	1785.84	130.12	0.4	0.281308	1.97577e-05	0.000528647	7.16953e-06	0.28129	1.9945e-05	-12.6297	0.709055	3231.1	3149.02		1
9353-073.1	2317.27	45.48	1	0.281086	2.27873e-05	0.000570634	6.21284e-06	0.281061	2.2912e-05	-8.47868	0.815196	3385.52	3311.52		1
9353-077.1	2325.68	23.76	2.3	0.280999	2.18848e-05	0.000706354	9.84106e-06	0.280968	2.2209e-05	-11.5903	0.790446	3582.97	3519.71		1
9353-083.1	1900.81	55.16	2.2	0.281245	2.03686e-05	0.000299482	4.7478e-06	0.281235	2.04489e-05	-11.9553	0.727111	3278.46	3198.85		1
9353-087.1	2518.23	46.4	4.1	0.281236	1.93235e-05	0.000475676	1.14396e-06	0.281213	1.93285e-05	1.63356	0.687324	2914.04	2814.24		1
9353-090.1	2695.28	21.1	2.7	0.281206	2.48732e-05	0.000997013	1.18881e-05	0.281154	2.52948e-05	3.67616	0.899676	2922.17	2822.89		1
9353-091.1	2580.5	12.52	2.4	0.281246	2.9949e-05	0.000675871	6.36636e-06	0.281213	3.00497e-05	3.07816	1.06857	2871.71	2769.59		1
9356-016.1	2726.01	36.72	2.8	0.280996	2.01125e-05	0.000512296	9.98655e-06	0.280969	2.04807e-05	-2.1867	0.728929	3310.31	3232.32		1
9356-017.1	2620.19	59.1	2.3	0.281126	2.08427e-05	0.000232433	2.06352e-06	0.281115	2.0858e-05	0.509924	0.741974	3061.96	2970.32		1
9356-024.1	2567.88	32.36	3.6	0.281159	1.95022e-05	0.000392188	3.09562e-06	0.28114	1.95387e-05	0.168219	0.694984	3043.17	2950.48		1
9356-027.1	2714.38	53.58	12.8	0.281034	2.13971e-05	0.000574628	4.81211e-06	0.281004	2.1478e-05	-1.20566	0.764328	3240.57	3158.76		1
9356-031.1	2249.54	62.42	14	0.281267	2.23557e-05	0.000677239	4.4882e-06	0.281238	2.2422e-05	-3.77268	0.79726	3043.4	2950.7		1
9356-032.1	2167.75	95.36	8.8	0.281198	1.84959e-05	0.000568141	1.53973e-05	0.281174	1.94136e-05	-7.91811	0.690447	3236.19	3154.08		1
9356-049.1	2567.9	73.3	0.3	0.281178	2.13236e-05	0.000482861	6.6695e-07	0.281155	2.13252e-05	0.700632	0.758485	3010.09	2915.58		1
9356-067.1	2500.48	127.2	31.4	0.281234	2.41967e-05	0.00134512	2.22261e-05	0.28117	2.56687e-05	-0.3213	0.912923	3021.97	2928.1		1
9356-068.1	2499.44	89.54	18.2	0.281168	2.51751e-05	0.000669407	1.81796e-05	0.281136	2.61322e-05	-1.57026	0.929522	3098.67	3009		1
9356-071.1	2466.69	156.84	30.3	0.281145	1.93816e-05	0.000625551	9.29325e-06	0.281116	1.97094e-05	-3.04657	0.701114	3165.03	3078.99		1
9356-075.1	2492.69	131.58	25	0.281187	0.000131364	0.000411632	2.70745e-06	0.281167	0.000131368	-0.60802	4.67225	3033.81	2940.58		1
9356-075.1	2492.69	131.58	25	0.281234	6.95124e-05	0.000477968	1.28388e-06	0.281211	6.95141e-05	0.941773	2.47196	2937.53	2839.01		1
9356-08.1	2757.18	59.3	2.2	0.281075	5.14879e-05	0.000777063	7.32749e-06	0.281034	5.1566e-05	0.865965	1.83487	3144.57	3057.55		1
9356-084.1	2306.51	259.72	-19.3	0.281294	3.05177e-05	0.00062297	5.83044e-06	0.281266	3.05997e-05	-1.43376	1.08793	2942.33	2844.07		1
9356-091.1	2523.6	109.28	9	0.281207	2.582e-05	0.000625693	7.86206e-06	0.281177	2.59974e-05	0.459178	0.924591	2991.19	2895.63		1
9356-091.2	2523.6	109.28	9	0.281213	2.41671e-05	0.000799962	2.73502e-05	0.281175	2.63683e-05	0.384695	0.937789	2995.82	2900.51		1
* External uncertainty in 176Lu/177Hf ratio estimated to be ~11% based on replicate analysis of 6266 reference zircon.
†External uncertainty in eHf estimated to be ± 1.4 based on replicate analysis of reference zircons 6266, Mud Tank and 91500.
eHf values calculated using measured age and CHUR values of Bouvier et al (2008) and 176Lu decay constant of 1.867 x 10-11yr-1 (Soderlund et al. 2004).
TDM = Depleted mantle model age based on 176Lu/177Hf = 0.03902 and 176Hf/177Hf = 0.28327. TNC = New crust model age of Dhuime et al. (2011; 176Lu/177Hf = 0.03781 and 176Hf/177Hf = 0.28316).
